# Supplementary material for: Dynamically reconfigurable liquid-core liquid-cladding lens in a microfluidic channel
Source: Royal Society of Chemistry journal article supplement (doi:10.1039/b717037h), 2008-01-01
Supplement: b717037h.pdf [file b717037h.pdf]

**Dynamically reconfigurable liquid-core liquid-cladding lens in a microfluidic  
channel**

**Supplementary Information**

Sindy K.Y. Tang, Claudiu A. Stan, and George M. Whitesides\*

*Department of Chemistry and Chemical Biology, Harvard University  
12 Oxford St., Cambridge, MA 02138*

---

\* corresponding author, e-mail: [gwhitesides@gmwgroup.harvard.edu](mailto:gwhitesides@gmwgroup.harvard.edu)

Figure S1. Microscope images of 6- $\mu\text{m}$  beads suspended in water flowing in expansion chambers with the following geometries: (a) square, (b) square with rounded corners, and at the following flow rates: (i) 1  $\text{mL hr}^{-1}$ , (ii) 10  $\text{mL hr}^{-1}$ , (iii) 20  $\text{mL hr}^{-1}$ , and (iv) 50  $\text{mL hr}^{-1}$ , respectively. The length and width of the expansion chamber are both 1 mm. Recirculation zones are prominent at 50  $\text{mL hr}^{-1}$ .

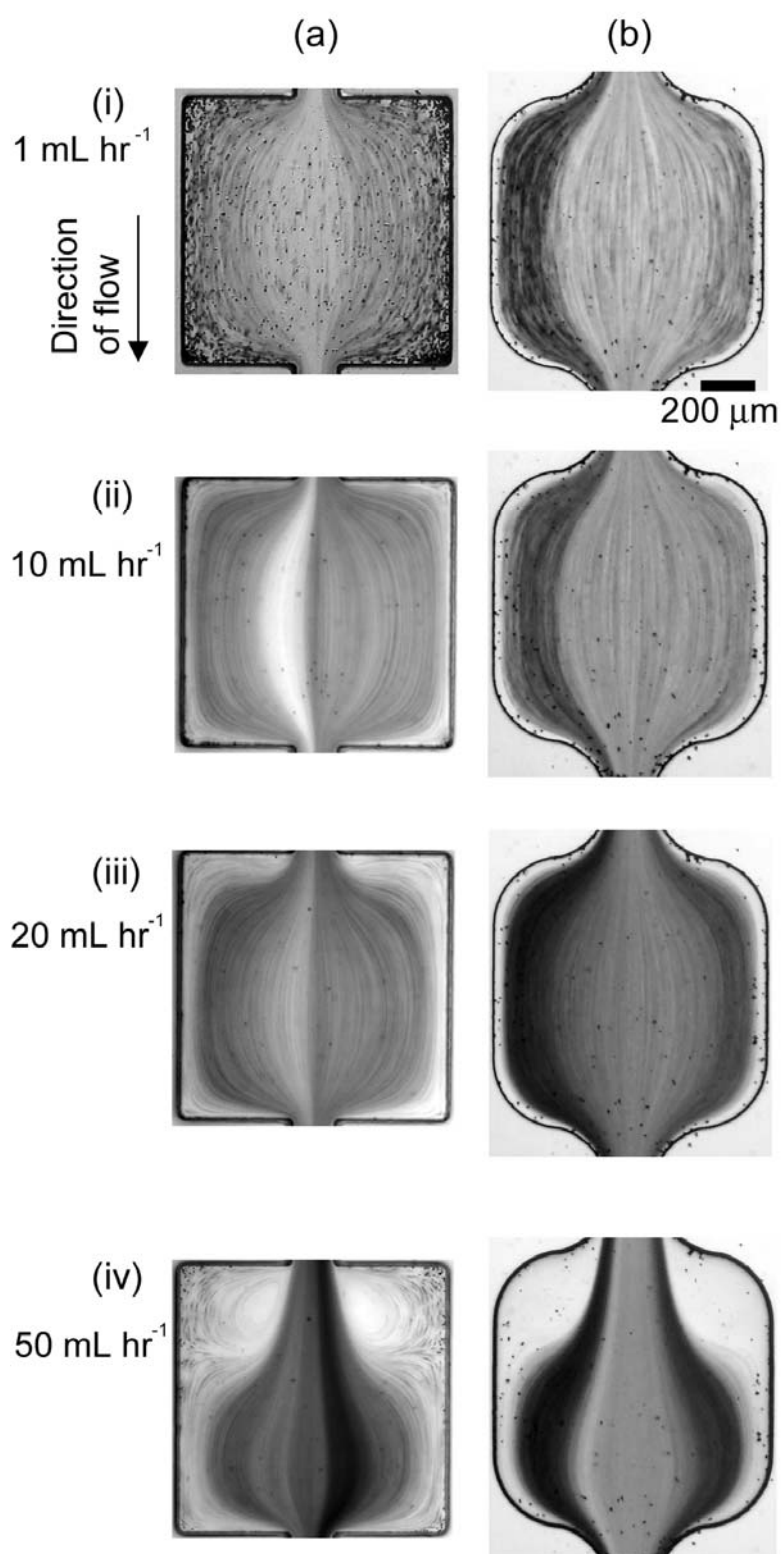

Figure S2. Radius of curvature ( $R_{curvature}$ ) of the core-cladding interface of the  $L^2$  lens as a function of time ( $t$ ) using (a) a 10 mL-plastic syringe (Becton Dickinson ‘Luer-Lok’ series), and (b) a 1 mL-glass syringe (Hamilton Gastight series), respectively, when the rate of flow of the core stream changed from 6 to 1.5 mL hr<sup>-1</sup> at time  $t = 0$ . The total flow rate of the core and both cladding streams was fixed at 10 mL hr<sup>-1</sup>. The core liquid was benzothiazole, and the cladding liquid was methanol. The data were extracted from movies of the  $L^2$  lens recorded with a high-speed digital camera (Phantom v7, Vision Research) at (a) 10 and (b) 100 frames per second respectively. The lines are fits to the data using the following expression:

$$R_{curvature}(t) = R_{curvature}(t = \infty) + \Delta R_{curvature} e^{-\frac{t}{\tau}},$$

where  $\Delta R_{curvature} = R_{curvature}(t = \infty) - R_{curvature}(t = 0)$

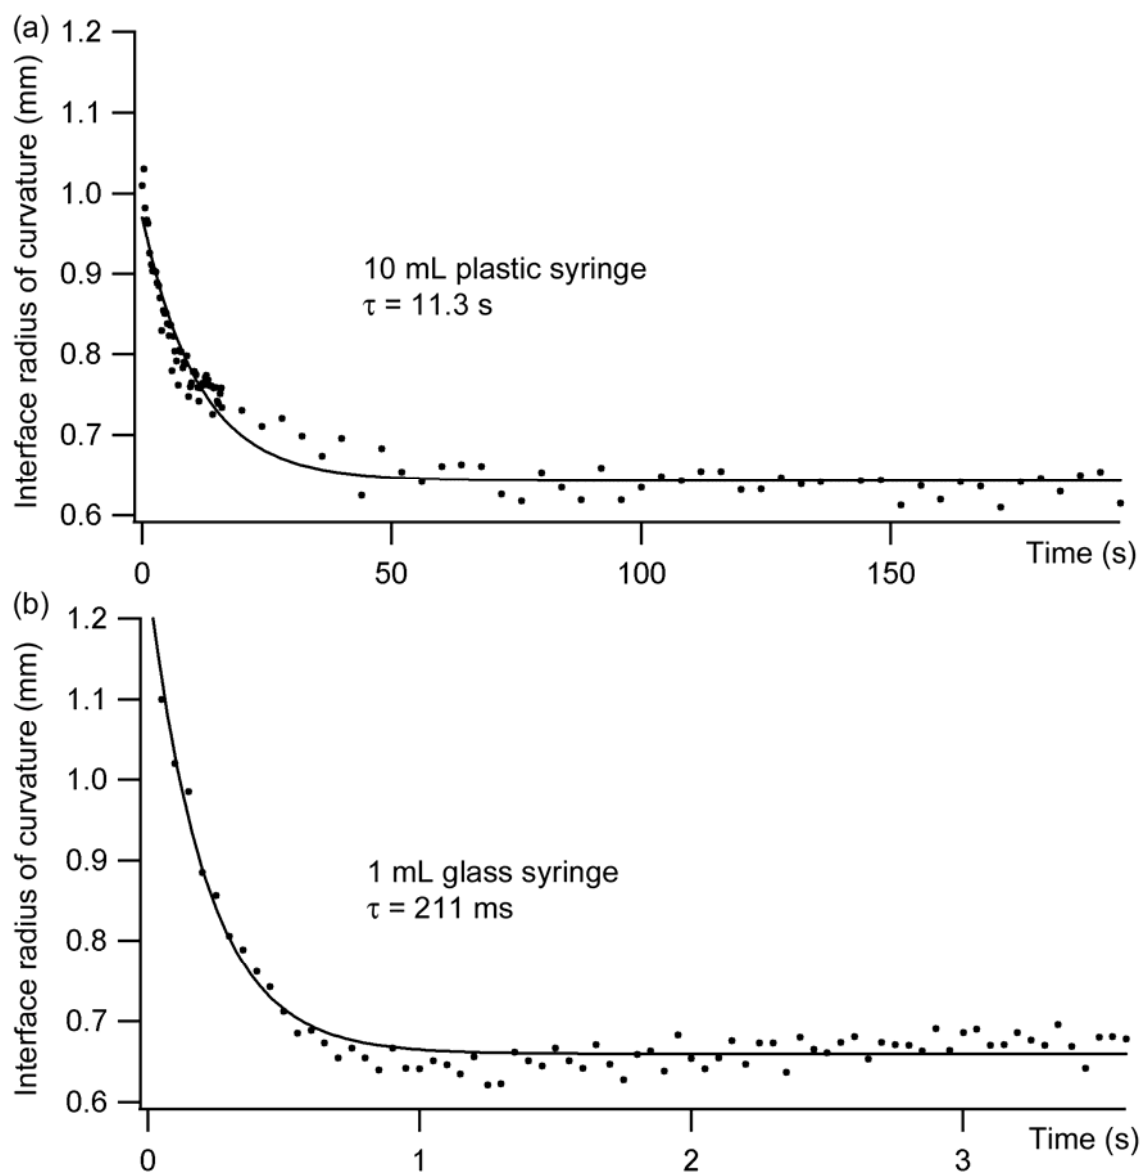

Figure S3. Radius of curvature ( $R_{curvature}$ ) of the core-cladding interface of the  $L^2$  lens as a function of time ( $t$ ) using (a) a 10 mL-plastic syringe (Becton Dickinson ‘Luer-Lok’ series), and (b) a 1 mL-glass syringe (Hamilton Gastight series), respectively. The rates of flow of the core and the cladding streams were kept constant at 6 mL hr<sup>-1</sup> and 4 mL hr<sup>-1</sup> respectively. The core liquid was benzothiazole, and the cladding liquid was methanol. The data were extracted from movies of the  $L^2$  lens recorded with a high-speed digital camera (Phantom v7, Vision Research) at (a) 10 and (b) 100 frames per second respectively.

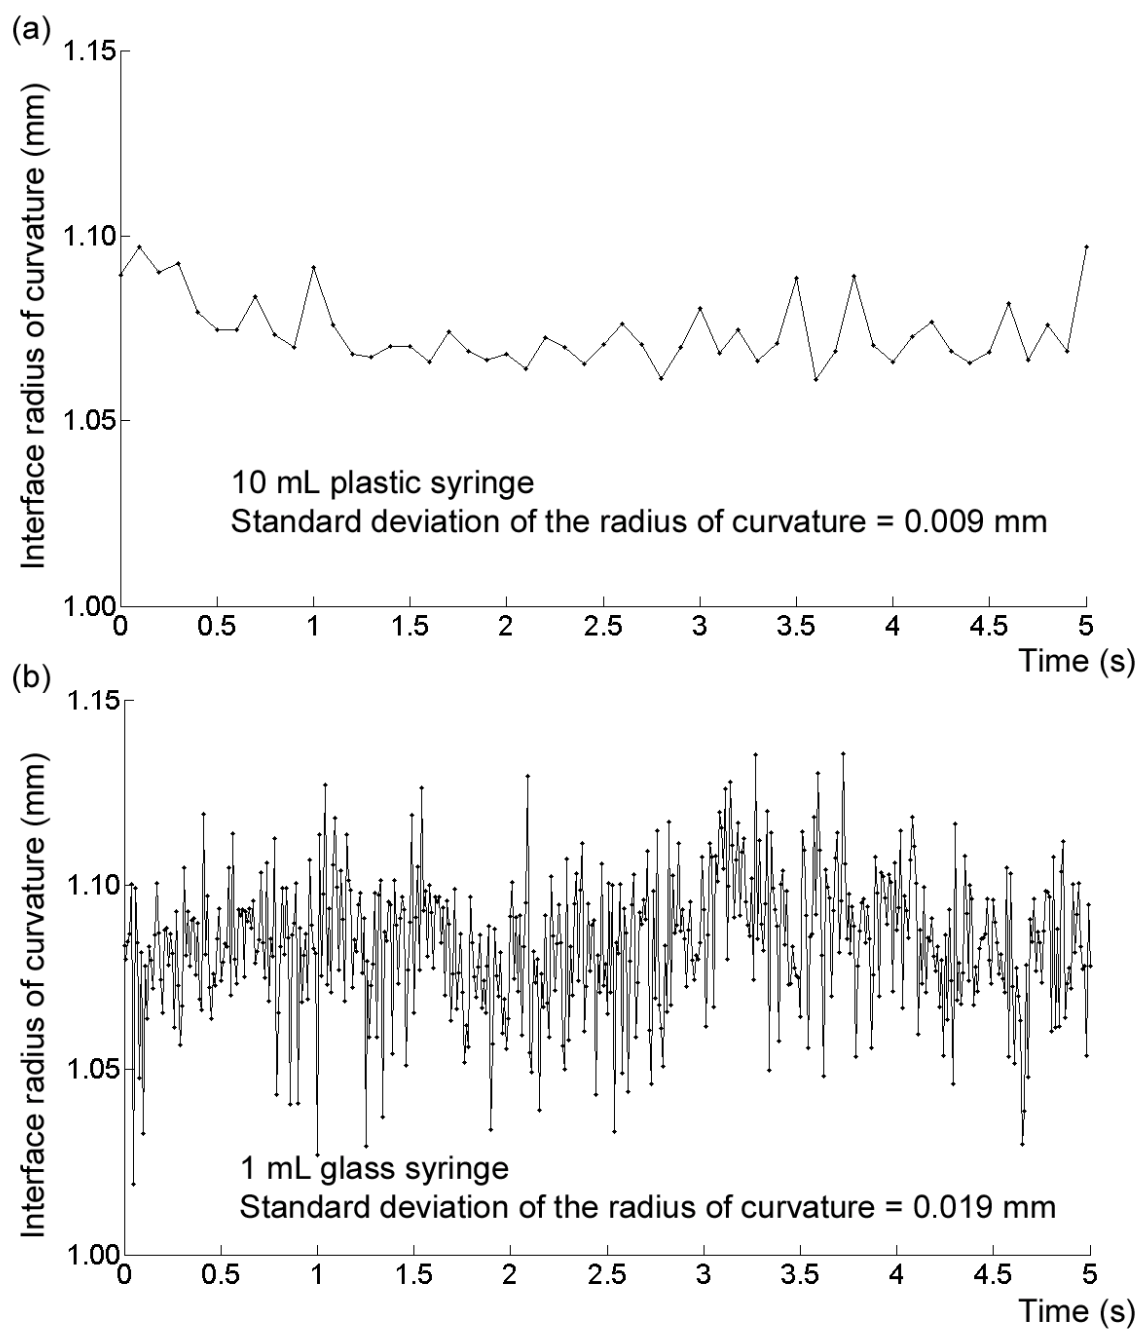

Figure S4. The variation in beam width as a function of the distance from the center of the  $L^2$  lens ( $x_1$ ) in a device with a 334- $\mu\text{m}$  aperture. The data were recorded using a CCD camera through a microscope objective with 5x magnification and a lens tube with a further 1.6x magnification. The line is a hyperbola fitted to the data. The core liquid was benzothiazole, and the cladding was a mixture of 53.6% trifluoroethanol, 31.5% benzothiazole and 14.9% ethanol with effective refractive index matched to that of PDMS ( $n_D^{22} = 1.412$ ), and density matched to that of benzothiazole in the core stream ( $\rho = 1.24 \text{ g cm}^{-3}$ ). The flow rates of the core and cladding streams were at  $5 \text{ mL hr}^{-1}$ , and  $5 \text{ mL hr}^{-1}$  respectively. The minimum FWHM was approximately  $16 \mu\text{m}$ .

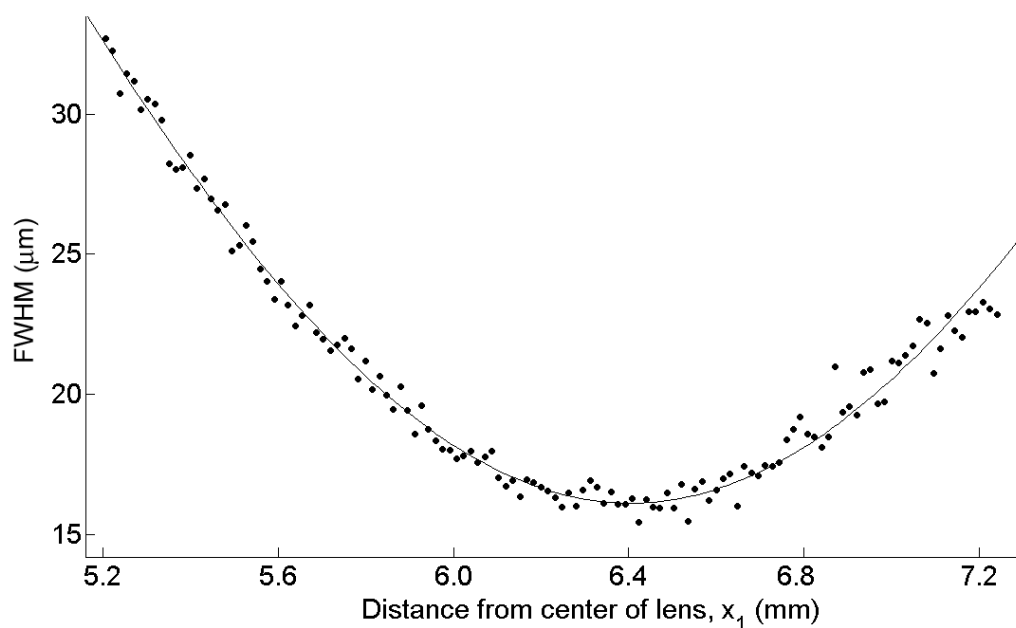



Figure S5. (a) Optical micrograph of the focused beam with no aperture in front of the expansion chamber for a  $L^2$  lens formed using benzothiazole as the core liquid, and a mixture of 53.6% trifluoroethanol, 31.5% benzothiazole and 14.9% ethanol with effective refractive index matched to that of PDMS ( $n_D^{22} = 1.412$ ), and density matched to that of benzothiazole in the core stream ( $\rho = 1.24 \text{ g cm}^{-3}$ ) as the cladding. The flow rates of the core and cladding streams were at  $4.5 \text{ mL hr}^{-1}$ , and  $5.5 \text{ mL hr}^{-1}$  respectively. The beam-tracing chamber was filled with rhodamine 640 perchlorate in ethylene glycol. (b) Intensity profile of fluorescence of the focused beam (blue dots) in (a) at  $x_1$  (distance away from the center of the  $L^2$  lens) = 8.6 mm. The FWHM was approximately  $40 \text{ }\mu\text{m}$ . We also plotted the intensity profile of an unfocused beam (black dots) at the same point in the beam-tracing chamber with no lens. The lines are Gaussian curves fitted to the data. The peak intensity of the focused beam was enhanced approximately 9 times.

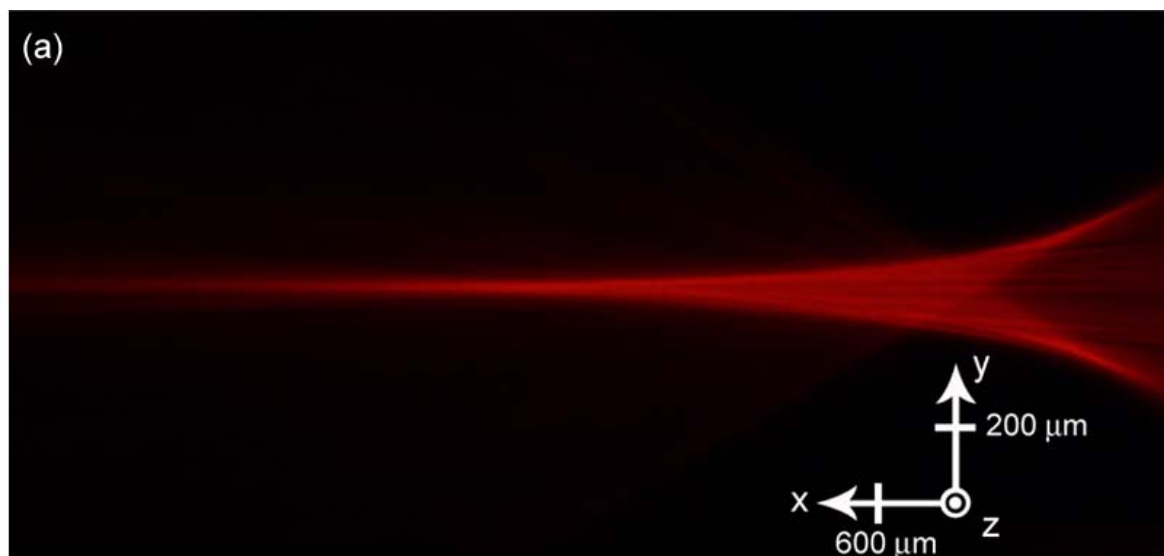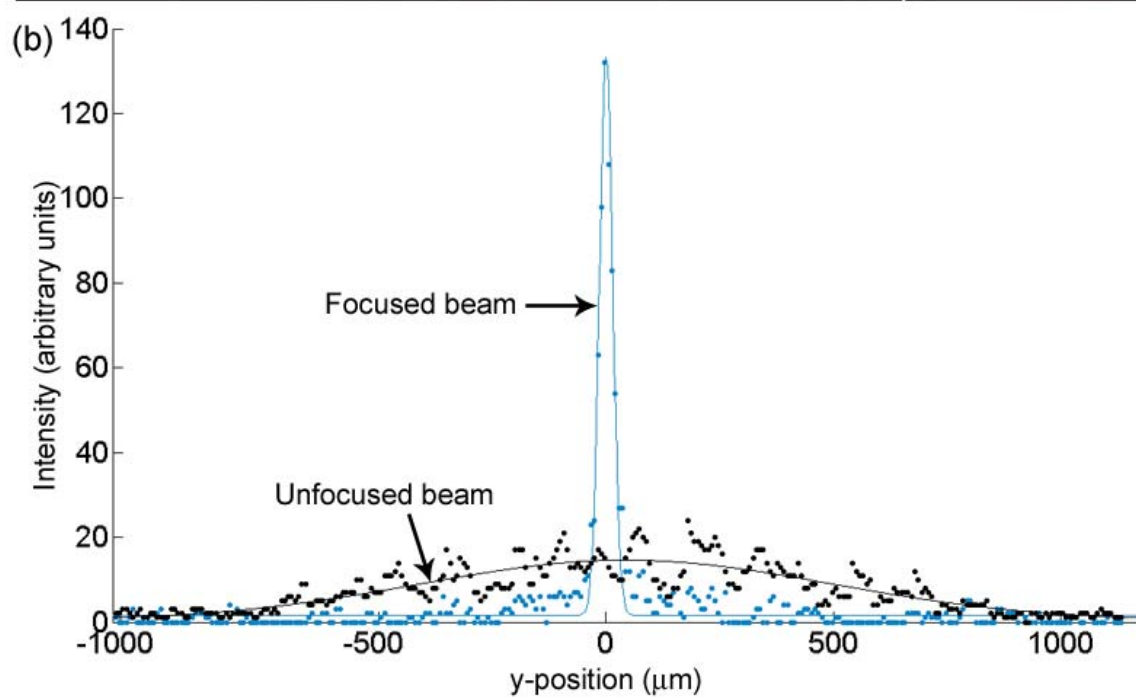

Table S1. Refractive index and hazard codes of selected liquids.

| Name                           | CAS Number | Refractive index <sup>1</sup> | Sigma Aldrich Hazard Codes <sup>2</sup> | NFPA <sup>3</sup>       |
|--------------------------------|------------|-------------------------------|-----------------------------------------|-------------------------|
| methylene iodide               | 75-11-6    | 1.749                         | Xi                                      | H3; F1; R0              |
| 1,2-diiodobenzene              | 615-42-9   | 1.718                         | Xi                                      | <sup>4</sup> H1; F1; R1 |
| 1-iodonaphthalene              | 90-14-2    | 1.701                         | Xi                                      | H2; F1; R0              |
| benzothiazole                  | 95-16-9    | 1.642                         | Xn                                      | H2; F0; R0              |
| 1,1,2,2-tetrabromoethane       | 79-27-6    | 1.637                         | T+                                      | H3; F0; R1              |
| carbon disulfide               | 75-15-0    | 1.627                         | F, T                                    | H3; F4; R0              |
| 1-methylnaphthalene            | 90-12-0    | 1.618                         | Xn, N                                   | H1; F2; R1              |
| bromoform                      | 75-25-2    | 1.596                         | T, N                                    | H3; F0; R0              |
| 3-bromobenzaldehyde            | 3132-99-8  | 1.593                         | Xn                                      | H2; F0; R0              |
| 2-chloroaniline                | 95-51-2    | 1.589                         | T,N                                     | H2; F0; R0              |
| thiophenol                     | 108-98-5   | 1.588                         | T+                                      | H4; F2; R0              |
| aniline                        | 62-53-3    | 1.586                         | T,N                                     | H3; F2; R0              |
| 2-iodoethanol                  | 624-76-0   | 1.572                         | T                                       | H2; F2; R0              |
| benzyl benzoate                | 120-51-4   | 1.568                         | Xn                                      | H1; F1; R0              |
| 2-thiophenemethanol            | 636-72-6   | 1.564                         | (not available)                         | H1; F0; R0              |
| bromobenzene                   | 108-86-1   | 1.557                         | Xi, N                                   | H2; F2; R0              |
| pyrrole-2-carbonitrile         | 4513-94-4  | 1.551                         | Xn, T                                   | H3; F0; R0;             |
| nitrobenzene                   | 98-95-3    | 1.550                         | T, N                                    | H3; F2; R1              |
| styrene                        | 100-42-5   | 1.545                         | Xn                                      | H2; F3; R0              |
| benzaldehyde                   | 100-52-7   | 1.544                         | Xn                                      | H2; F2; R0              |
| m-cresol                       | 108-39-4   | 1.542                         | T                                       | H3; F2; R0              |
| 2-acetyl thiophene             | 88-15-3    | 1.540                         | T                                       | H1; F2; R0              |
| benzyl alcohol                 | 100-51-6   | 1.538                         | Xn                                      | H1; F1; R0              |
| 3-acetyl-2,5-dimethylthiophene | 2530-10-1  | 1.532                         | Xi                                      | <sup>4</sup> H1; F1; R1 |
| thiophene                      | 110-02-1   | 1.526                         | F, T                                    | H2; F3; R0              |
| pyrrole                        | 109-97-7   | 1.508                         | T                                       | H2; F2; R0              |
| 2,4-dimethyl thiazole          | 541-58-2   | 1.502                         | Xi                                      | <sup>4</sup> H1; F2; R1 |
| 2-isobutyl thiazole            | 18640-74-9 | 1.491                         | Xi                                      | <sup>4</sup> H1; F2; R1 |
| dimethyl sulfoxide             | 67-68-5    | 1.479                         | (not available)                         | H1; F1; R0              |
| formamide                      | 75-12-7    | 1.447                         | T                                       | H2; F1; R0              |

|                        |           |       |       |            |
|------------------------|-----------|-------|-------|------------|
| N,N-dimethylacetamide  | 127-19-5  | 1.438 | T     | H2; F2; R0 |
| ethylene glycol        | 107-21-1  | 1.429 | Xn    | H1; F1; R0 |
| propylene carbonate    | 108-32-7  | 1.422 | Xi    | H1; F1; R0 |
| acetic acid            | 64-19-7   | 1.370 | C     | H2; F2; R2 |
| ethanol                | 64-17-5   | 1.359 | F     | H0; F3; R0 |
| acetonitrile           | 75-05-8   | 1.344 | F, Xn | H2; F3; R0 |
| water                  | 7732-18-5 | 1.333 | None  | H0; F0; R0 |
| methanol               | 67-56-1   | 1.328 | F, T  | H1; F3; R0 |
| 2,2,2-Trifluoroethanol | 75-89-8   | 1.300 | Xn    | H2; F3; R0 |

<sup>1</sup> Source of refractive indices: Sigma-Aldrich catalog. <http://www.sigmaaldrich.com>

<sup>2</sup> Hazard codes from Sigma Aldrich:

|    |                               |
|----|-------------------------------|
| C  | Corrosive                     |
| F  | Flammable                     |
| F+ | Extremely flammable           |
| Xn | Harmful                       |
| Xi | Irritant                      |
| N  | Dangerous for the environment |
| T  | Toxic                         |
| T+ | Very toxic                    |

[http://www.sigmaaldrich.com/Help\\_Pages/Help\\_Welcome/Product\\_Search/Risk\\_\\_\\_Safety\\_State\\_ments.html#Risk Phrases](http://www.sigmaaldrich.com/Help_Pages/Help_Welcome/Product_Search/Risk___Safety_State_ments.html#Risk Phrases)

<sup>3</sup> The National Fire Protection Agency (NFPA) hazard identification system: H, F, R represent Health, Flammability, and Reactivity here. The number ratings range from 0-4. A rating of 0 represents essentially no hazard; a rating of 4 indicates extreme danger.  
[http://www-ssrl.slac.stanford.edu/safety/nfpa\\_hazard\\_class.html](http://www-ssrl.slac.stanford.edu/safety/nfpa_hazard_class.html)

<sup>4</sup> National Paint & Coatings Association (NPCA) Hazardous Materials Identification System (HMIS) ratings: H, F, R represent Health, Flammability, and Reactivity. The number ratings range from 0-4. A rating of 0 represents essentially no hazard; a rating of 4 indicates extreme danger.
